# Supplementary material
Source: publisher site journal article supplement (https://www.dovepress.com/article/368442)
Supplement: Supplementary file 1 [file get_supplementary_file.php]

**Supplemental Table 1: Sensitivity Analyses**

| Analysis                  | Descriptive | <u>30-day Mortality</u> |                           | <u>Intubated</u>           |                           | <u>NIPPV</u>               |                           |
|---------------------------|-------------|-------------------------|---------------------------|----------------------------|---------------------------|----------------------------|---------------------------|
| 1: Complete Case Analysis |             |                         |                           |                            |                           |                            |                           |
| Continuous                | Range       | Events/Total            | aOR (95% CI) <sup>a</sup> | Events/Total               | aOR (95% CI) <sup>b</sup> | Events/Total               | aOR (95% CI) <sup>c</sup> |
| Bolus rate, ml/kg/hr      | 5-280       | 24/3175                 | 1.13 (1.00-1.29)*         | 136/3143                   | 1.16 (1.08-1.24)*         | 219/3010                   | 1.24 (1.07-1.43)*         |
| 2: Imputed Analysis       |             |                         |                           |                            |                           |                            |                           |
| Continuous                | Range       | Events/Total            | aOR (95% CI) <sup>a</sup> | Events <sup>d</sup> /Total | aOR (95% CI) <sup>b</sup> | Events <sup>d</sup> /Total | aOR (95% CI) <sup>c</sup> |
| Bolus rate, ml/kg/hr      | 5-280       | 48/3950                 | 1.15 (1.05-1.27)*         | 172/3950                   | 1.18 (1.10-1.26)*         | 278/3950                   | 1.19 (1.03-1.37)*         |
|                           |             |                         |                           |                            |                           |                            |                           |

Abbreviations: aOR = adjusted odds ratio; CI = confidence interval; mL/kg/hr = milliliters per kilogram per hour; NIPPV = Non-Invasive Positive Pressure Ventilation \*p<0.05

<sup>a</sup> Adjusted model includes age, sex, total bolus volume, ICU admission, hypotension, vasoactive agent started, and intubation; Risk-estimate per 20 unit increase in bolus rate

<sup>b</sup> Adjusted model includes age, sex, total bolus volume, ICU admission, hypotension, vasoactive agent, time from arrival to first IVF, time from arrival to first antibiotic; Risk-estimate per 20 unit increase in bolus rate

<sup>c</sup> Adjusted model includes age, sex, total bolus volume, hemoglobin, ICU admission, hypotension, vasoactive agent, time from arrival to first IVF, time from arrival to first antibiotic, and quadratic term for bolus rate; Risk-estimate for a 20 unit increase above bolus rate of 20 ml/kg/hr

<sup>d</sup> Average number of events across 20 imputed datasets
